# Supplementary material for: Split-Second Decisions: Exploring the relationship between Time Pressure, AI Assistance, Moral Decision-Making and Responsibility
Source: Research Square preprint supplement (doi:10.21203/rs.3.rs-8162843/v1), 2025-12-08
Supplement: Supplementary file 1 [file 412f991f50a71d2d2ac672e6.docx]

**Split-Second Decisions: Exploring the relationship between Time Pressure, AI Assistance, Moral Decision-Making and Responsibility.**

***Supplementary materials.***

To identify morally challenging scenarios, 128 situations varying in risks, benefits, and costs were evaluated by five expert military officers in a pre-test phase. These scenarios combined parameters such as: (1) the strategic importance of the target (tactical, operational, strategic); (2) potential civilian infrastructure damage (risk: 0–100%; value: low, medium, high); (3) potential civilian casualties (risk: 0–100%; number: 1–100+); (4) potential allied losses (risk: 0–100%); and (5) critical consequences of action or inaction. These combinations were designed to create morally complex, uncertain decision contexts. Experts rated 30 scenarios as not morally challenging (15 clear Attack trials, 15 clear No Attack trials), and 55 as morally demanding. A second group of five officers then evaluated the 55 complex scenarios, indicating whether they would choose to attack. From this, 15 situations in which at least one officer opted to attack were selected as Moral Decision-Making (Moral) trials. Experts showed high hesitation, opting to attack only 20% of the time, confirming the scenarios' moral difficulty. Participants in the main experiment were unaware of expert decisions.
